# Supplementary material
Source: PubMed Central journal article supplement (PMC9536458)
Supplement: Supp_FigS1.pdf [file Supp_FigS1.pdf]

## Supplemental Figure 1. Map and sequence of the miniFXN 1 construct.

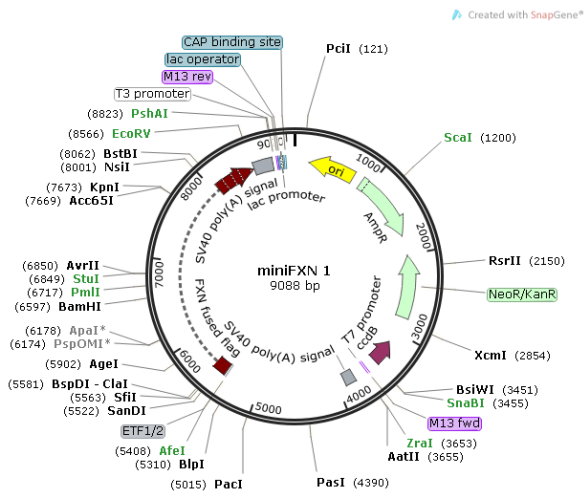

### Sequence:

```

cttccgcttctcgtcactgactcgctgcgctcggctcgttcggctcggcgagcggtatcagctcactcaaggcggtataacggttatccacagaatc
aggggataacgcaggaaagaacatgtgagcaaaaaggccagcaaaaggccaggaaaccgtaaaaaggccgcttgctggcgttttccataggctccg
ccccctgacgagcatcaaaaaatcgacgctcaagtcagagggtggcgaaaccgacaggactataaagataaccaggcgtttcccctggaagctcc
ctcgtgcgctcctcgtttccgaccctgcccttaccggatacctgtccgcctttcctcctcggaagcgtggcgcttttcatagctcacgctgtaggtat
ctcagttcgggtgtaggtcgttcgctcaagctgggctgtgtgcacgaacccccgttcagcccgaccgctgcgccttatccgtaactatcgtcttagtc
caaccggtaagacacgacttatcgccactggcagcagccactgtaacaggattagcagagcaggtatgtaggcggtgctacagagttctgaag
tggtggcctaactacggctacactagaagaacagtatttggtatctgcgctctgctgaagccagttacctcggaaaaagagttgtagctcttgatcc
ggcaaaaccaccgctgtagcgggtggtttttgttgcaagcagcagattacgcgcagaaaaaaggatctcaagaagatcctttgatcttttct
acggggtcgtacgctcagtggaacgaaaactcacgttaagggattttggtcatgagacaataaccctgataaatgcttcaataattgaaaaaggaa
gagtatgagattcaacattcgtgtcgccttattcctttttgctggcattttgcttctctgttttctcaccagaaacgctggtgaaagtaaaagat
gctgaagatcagttgggtgcacgagtggttacatcgaactggatctaacagcggtgaagatccttgagagttttcgccccgaagaacgttttcaatg
atgagcacttttaagttctgctatgtggcgggtattatcccgtattgacgcgggcaagagcaactcggctcggcgcatacactattctcagaatgact
tggtgagtagtaccagtcacagaaaagcatcttacggatggcatgacagtaagagaattatgtagtgctgcataaccatgagtgataaacactgag
gccaacttactctgacaacgatcggaggaccgaaggagtaaccgctttttgcacaacatgggggatcatgtaactcgccttgatcgttgggaaccg
gagctgaatgaagccatacacaacgacgagcgtgacaccacgatcctgtagcaatggcaacaacgttgcgcaaactattaactggcgaactactta
ctctagcttcccggcaacaattaatagactggatggaggcggataaaagttgcaggaccacttctgcgctcggccttccggctgggtggtttattgctga
taaatctggagccggtgagcgtgggtctcgggtatcattgcagcactggggccagatggtgaagcctcccgtatcgtagttatctacacgacgggga
gtcaggcaactatggatgaacgaaaatagacagatcgctgagataggtgcctcactgattaagcattggtactgtcagaccaagtttactatata
ctttagattgattaaaactcatttttaattaaaaggatctaggtaagatccttttgataatctatgagcggatacatatttgaatgatttagaaa
aataaacaataggggttcgcgcacatttcccgaaggatgacccctgatcgggtgtaaataccgcacagatgcgtaaggagaaaataccgcac
aggaaattgtaagcgttaataattcagaagaactcgtcaagaaggcagatagaaggcagatgcgctgcgaatcgggagcggcgataaccgtaaagcag
aggaagcggtcagccattcggcgaagcctttagcaatatacagggtagcaacgctatgtcctgtagcggctccgcaacaccagccggccac
agtcgatgaatccagaaaagcggccatttccacatgatattcggaagcaggatcgcctatgggtcaccgacgagatcctcggctcgggcatgctc
gccttagcctggcgaacagttcggctggcgcgagccctgatgctcctcgtccagatcatcctgatcgacaagaccggttccatccgagtagctgct
cgctcgatgcgatgtttcgttggtggtcgaatgggcaggttagccggatcaagcgtatgcagccgctgattgcatcagcatgatggatactttctg
gcaggagcaaggtgagatgacaggagatcctgccccgacttgcaccaatagcagccagtccttcccgttcagtgacaacgtcgagcacagctg
cgcaaggaaccccgtcgtggccagccacgatagccgctgcctcgttgcagttcattcagggcaccggacaggtcgttgcacaaaagaac
cgggcccctcgcgtgacagccggaacacggcggcatcagagcagccgattgtctgttgtgccagtcgatagccgaatagccttccaccaagcg

```

gccggagaacctgctgcaatccatcttgttcaatcatgcaaacgatcctcatcctgtctcttgatcagagcttgatcccctgcccacagatccttgg  
cggcaagaaagccatccagtttactttgcagggcttcccaacctaccagagggcgcccagctggcaattccggttcgcttgctccataaaaccgc  
ccagtctagctatgcccagtaagcccactgcaagctacctgctttctttgctgctgtttcccttgccagatagcccagtagctgacattcatccg  
gggtcagcaccgtttctgaggactggctttctacgtgaaaaggatctaggtgaagatccttttgataatctcatgacctgacatttatccccagaaca  
tcaggtaaatggcgttttgatgtcattttcggggtgctgagatcagccacttctccccgataacggagaccggcacactggccatatcggtggtcatc  
atgcccagctttcatccccgatagcaccaccgggtaagttcacgggagactttatctgacagcagctgactggccagggggatcacatccg  
tcccccggcgtgcaataatcactctgtacatccacaaacagacgataacggctctctctttataggtgtaaacttaactgccgtacgtatagg  
ctgccaactgtgggaaggggatcggtgcccgtctctgctattacgccagctggcgaaagggggatgtgctgcaaggcgattaagttgggtaac  
gccagggtttccagtcacgacgttgaacgacggccagtgattgaatacactcactatagggcgaattgaatttagcggccgacgctgt  
aactagaggatcataatcagccataccacattgtagaggtttactgtcttaaaaaactccccacactccccctgaacctgaaacataaaatgaat  
gcaattgtgtgtaactgtttattgagccttataatggttacaataaagcaatagatcacaaaattcacaataaagcatttttctactgattct  
agtgtggtttgtccaaactcatcaatgtatcttatcatgtctggatctgactctagtgaattcgcccttctcttccagattcacaagtggctttgga  
agaacttagtaccttcccatcttctgcccagtaaggtgtacacaactgacattttcttttttaagacagatcttctgatgagccgggctggaa  
tgctgtggctattcacaggcacaatcatagctcactgacgcttagctcccaggctcaagtatctcccgcctcagcctctgagtagctgagatcac  
aggatgactaccacactcggctcacatttgacatcctctaaagcatataaaatgtgaagaaaactttcacaattgcatccctttgtaatatgaa  
cagaataaaactcttttaaaatctatcaacaataggcaaggcacgggtggctcacgctgtcgtctcagcactttgtgaggccaggcgggcagatc  
gtttgagcctagaagtcaagaccacctgggcaacatagcgaacccctttctacaaaaatacaaaaactagctgggtgtggtggtgcacacctg  
tagtcccagctacttggaggctgaaatgggaagactgcttagcccgggaggggagaagtgcagtaagccaggaccacaccactgactccagcct  
gggcaacagagttagactctgtctcaacaaacaaataaatgaggcgggtggatcacagagtcagtagatcgagaccatcctggtaaacagggtga  
aacctgctctactaaaaaaaaaaaaaaaaatacaaaaaaattagccagcagtggtggcggcgctgtagtcccagttactcgggaggctgaggcagg  
agaatggcgtgaaaccgggaggcagagcttgactgagcagatcgaccactgcctccagcctgggagcagagcgagactccgtctcaatca  
atcaatcaataaaaaatctattaacaatatttattgtgacttaacaggaacatgcctgtccaaaaaaactttacagggcttaactcattttatct  
taccacaatcctatgaagtaggaactttataaaacgcatttataaaacaggcacagagaggttaattaactgcctctggtcacacagctaggaa  
gtgggcagagtacagattacacaaggcatcctgtcctggccccacatacccaactgtgtaaacccataaccggcgccaagcagcctcaattgtg  
catgaccacttcccagcaagacagcagctccaagtctctctgtttagaattttagaagcggcgggccaccaggctgactctccctgggtcagg  
ggtcctggtgactccgtgctttgcacaaagcaggctctcattttgttaaatgcagaaatgtgtaagctgggaagtcttctgaggctaacctc  
tagctgtccccacagaagagtgcctgcccagtgccaccaggggtgcggcagcaccagcgtggaggggcggagcggggcagaccggg  
agcagcatgtgactctcgggcccgcgagtagccggcctctggcgtcaccagcccagcccaggcccagaccctcaccgggtcccggcggcgg  
cagagttggcccactctgcccggcctggcctgcccagcagatcgatcgactgcagccccgcgagtaagatccgcccgggaacag  
ccgcccggccgacgcccggggccgacgcccagcctgcccagggagggcggcggcagcggggtgctccgggtacgcccgctggactagctc  
accccgtccttctcagggcggccggcgggaagcggcctgcaactccttctggttctccgggtgatttactgcttcttccgaaggaaa  
aggggacattttgctgctgctgactgcccgggtcaaggcagggcgaaggcagggcagggctggtggaggggaccggttccgaggggtgtgctgct  
gtctcatgcttgcacttctctgcgataactgtttcagtaataatagatggatctgctagtataacatacacataatgtgtgtctgtgtatc  
tgtatagcgtgtgtgtgtgtgtgtgtttgcccgcagggcgccgacacctaataatttcaaggctggattttttgaaacgaaatgcttctgga  
acgaggtgaaactttcagagctcagaatagctagagcagcagggccctggcttttgaaactgaccgacctttattccagattctgcccactccg  
cagagctgtgtgacctgggggattcccctaactctctgagacgtggcttgtttctgtagggaagataaaggtagcggcattttgaggacctgg  
tgtgaggatgaaatgggaataacatagataaagtctcagaactcaaatagttccccttctctttgggggtacaaagaaatactgaccagtt  
acgccagcgttgaaggaggaaacccaaagaatggctgtggggatgaggaagattctcaaggggaggacatggtattatgagggtcttgaag  
atgcaaggaagtgttagagggtttcacgaggagggaaccgtctgggcaaggccaggaaggcgggaaggggatccctcagagtggtggtacg  
ccgcatgtattaggggatgaaagaggcaggccactcaagccatattgtgtgctctccggagttgtactttaggcttgaactccccacagctg  
tattggcccacattgtgttgaagaaactttgggattggttgcagtgcttaaaagttaggacttagaaaatggatttctggcaggacgctggtgctc  
atgccataatctcagcactttgggaggcctaggaagggtgacactgaggtccggagttcaagactaacctggccaacatggtgaaaccagtatc  
tactaaaaatacaaaaaaaaaaaaaaaaaaagaagaagaagaagaagaaataaagaaaagttagccggcgctggtgtcgcgcgctgtaatccca  
gctactccagaggctgcccagggagaatcgttgagcccgggaggcagaggttgattaagccaagatcgccaatgactccggcctggcgaca

gagcaagactccgtctcaaaaaataataataataaaaaataaaaaataaaatggatttcccagcatctctggaaaaataggcaagtgtggccat  
gatggccttagatctcctctaggaaagcagacatttacttggcttctgtgactatctgagctgccacgtattgggcttccaccctgcctgtgtgga  
cagcatgggtgtcagcagagttgtgttttgttttggagacagagttccctctgtgtgccaggctggagtgagtggtcagctcagctcact  
gcaacctctgcctcctgggttcaagtattcctgcctcagcctcccagtagctgggattatcggctaattttgtatttttagtagagacagatttctcc  
atgttggctcaggctggtctcgaactcccaacctcaggtgatccgccacctgccctccaaagtctggaattacaggcgtgagccaccgctgtggc  
catcagcagagttttaatttaggagaatgacaagggtgtacagtttttagatggtacctggtggctgtaagggtattgactgacaaacacacc  
caacttggcgtgcccaggagggtggacactgggttctggatagatggttagcaacctctgtcaccagctgggctctttttctatactgaattaa  
tcacatttgttaacctgtctgttccatagttcccttgacatcttgggtatttggaggtgggtggcagtggaactggggccaccatcctgttta  
attatttaagccctgactgtcctggattgaaggcgaaattcgcccttgcaactgtagaagtagcaatatataaattatgcattaatgggtata  
attcactgaaaaatagtaacgtacttctaacttggcttccagagttcgaaccaacgtggcctcaaccagatttggaaatgcaaaaagcagagtgct  
atgtgatgaatttggagaaatctggaacttgggcccaccaggctctctagatgagaccacatgaagactagcagaggaaacgctggactcttta  
gcagagtttttgaagacctgacagacaagccatacacgtttgaggactatgatgtctcttgggagtggtgtctaactgtcaaacgggtggagatc  
taggaacctatgtgatcaacaagcagacgcaacaagcaaatctggctatcttccatccagtgagcctaagcgttatgactggactgggaaaaac  
tgggtgtactcccacgacggcgtgtccctccatgagctgctggccgagagctcactaaagccttaaaaacaaactggactgtcttcttggcctatt  
ccggaaaagatgctcggatactgggtgatggattacaaggatgacgacgataagtgatatctagaggatcataatcagccataccacattttagaggt  
ttacttgccttaaaaaacctcccacacctcccctgaacctgaaacataaaatgaatgcaattgttgtttaaactgtttattgcagcttataatggta  
caaataaagcaatagcatcacaatttcacaaataaagcatttttctactgcattctagtgtgtgttccaaactcatcaatgtatcttatcatgtctg  
gatctgcgactctagtccttttagtggggttaattctgagcttggcgtaatcatggtcatagctgttctctgtgtgaaattgttatccgctcacaattcca  
cacaacatacagagccggaagcataaagtgtaaagcctggggtgcctaataagtgagtaactcacattaattgcgttgcgctcactgccgcttcca  
gtcgggaaacctgtcgtgccagctgcattaatgaatcggccaacgcgggggagaggcggttgcgtattggcgct
